# Supplementary material
Source: MDPI journal article supplement (https://www.mdpi.com/2075-163X/14/1/64)
Supplement: s1 [file s1]

# Insights Into the Subduction of the Ligure-Piemontese Oceanic Basin: New Constraints From the Metamorphism in the Internal Ligurian Units (Northern Apennines, Italy)

Edoardo Sanità <sup>1</sup>, Maria Di Rosa <sup>1</sup>, Michele Marroni <sup>1,2,\*</sup>, Francesca Meneghini <sup>1,2</sup> and Luca Pandolfi <sup>1</sup>

## Supplementary material

### *Analytical conditions*

Map and spot analyses were acquired with the microprobe JXA-8800 of Dipartimento di Scienze della Terra “A. Desio” of the Università di Milano Statale (Italy) and with the microprobe 8200 of Department of Earth Science of the University of Genève (Switzerland). Standard used were diopside (Si, Mg, Ca), orthose (Al, K), MnTiO<sub>3</sub> (Mn, Ti), garnet (Fe) and albite (Na).

Spot analyses were performed at 15 KeV and 5 nA. Beam size diameter was set to 2 µm. Mapping conditions were 15 KeV and 5 nA, with a counting time of 20 ms per grid point.

For each mineral included in the maps, a series of spot analysis were acquired in order to catch the chemical variability presented. These spot analyses were then used as internal standards to calibrate all the element intensity maps obtained with the microprobe, obtaining maps of element concentrations. This calibration was performed using XMapTools 3.2.6 (Lanari et al., 2014a) that was also used to plot ternary and binary diagrams and to export composition of chlorite and phengite. Pressure and temperature conditions were instead calculated using ChlMicaEqui (Lanari, 2012).

**Table S1.** Examples of mineral chemistry of white mica selected along the S1 foliation of metapelites of IL units.

|                                | ULI3b   |       |       |       | ULI7  |       |       |       | ULI8  |       |       |       |
|--------------------------------|---------|-------|-------|-------|-------|-------|-------|-------|-------|-------|-------|-------|
|                                | Wm26    | Wm27  | Wm81  | Wm8   | Wm16  | Wm5   | Wm11  | Wm12  | Wm8   | Wm99  | Wm7   | Wm61  |
|                                | Wt%     |       |       |       |       |       |       |       |       |       |       |       |
| SiO <sub>2</sub>               | 47.4    | 48.76 | 52.30 | 47.40 | 49.31 | 54.14 | 55.38 | 50.28 | 49.72 | 50.19 | 47.68 | 51.33 |
| TiO <sub>2</sub>               | 0.00    | 0.24  | 0.00  | 0.00  | 0.09  | 1.51  | 0.44  | 0.20  | 0.80  | 0.40  | 0.32  | 0.40  |
| Al <sub>2</sub> O <sub>3</sub> | 29.02   | 32.43 | 31.92 | 24.66 | 31.86 | 27.96 | 28.94 | 30.01 | 32.10 | 32.75 | 31.71 | 28.66 |
| FeO                            | 6.73    | 3.11  | 2.24  | 13.47 | 1.70  | 1.71  | 2.19  | 2.30  | 1.90  | 1.69  | 4.74  | 1.69  |
| MnO                            | 0.00    | 0.00  | 0.00  | 0.00  | 0.04  | 0.00  | 0.06  | 0.02  | 0.01  | 0.00  | 0.08  | 0.00  |
| MgO                            | 3.56    | 1.92  | 0.89  | 0.89  | 1.84  | 1.37  | 1.69  | 1.51  | 1.77  | 0.93  | 2.42  | 2.79  |
| CaO                            | 0.08    | 0.22  | 0.79  | 0.48  | 0.07  | 0.18  | 0.16  | 0.1   | 0.05  | 0.12  | 0.08  | 0.06  |
| Na <sub>2</sub> O              | 0.00    | 0.71  | 0.00  | 0.00  | 0.33  | 0.42  | 0.34  | 0.39  | 0.44  | 0.00  | 0.48  | 0.00  |
| K <sub>2</sub> O               | 8.25    | 8.03  | 9.28  | 8.25  | 8.99  | 8.81  | 8.27  | 8.26  | 9.17  | 9.50  | 8.24  | 10.50 |
| Total                          | 95.04   | 95.42 | 97.42 | 95.15 | 94.23 | 96.10 | 97.47 | 93.07 | 95.96 | 95.58 | 95.76 | 95.43 |
|                                | Cations |       |       |       |       |       |       |       |       |       |       |       |
| Si                             | 3.21    | 3.22  | 3.36  | 3.33  | 3.28  | 3.51  | 3.53  | 3.38  | 3.26  | 3.29  | 3.17  | 3.40  |
| Fe <sub>TOT</sub>              | 0.38    | 0.17  | 0.12  | 0.79  | 0.09  | 0.09  | 0.12  | 0.13  | 0.10  | 0.09  | 0.26  | 0.09  |
| Al <sub>TOT</sub>              | 2.32    | 2.52  | 2.42  | 2.04  | 2.50  | 2.14  | 2.17  | 2.37  | 2.48  | 2.53  | 2.49  | 2.23  |
| Mg                             | 0.36    | 0.19  | 0.09  | 0.09  | 0.18  | 0.13  | 0.16  | 0.15  | 0.17  | 0.09  | 0.24  | 0.28  |
| Ca                             | 0.01    | 0.02  | 0.05  | 0.04  | 0.00  | 0.01  | 0.01  | 0.01  | 0.00  | 0.01  | 0.01  | 0.00  |
| Na                             | 0.00    | 0.09  | 0.00  | 0.00  | 0.04  | 0.05  | 0.04  | 0.05  | 0.06  | 0.00  | 0.06  | 0.00  |
| K                              | 0.71    | 0.68  | 0.76  | 0.74  | 0.76  | 0.73  | 0.67  | 0.71  | 0.77  | 0.79  | 0.70  | 0.89  |
| XMg                            | 0.49    | 0.52  | 0.41  | 0.11  | 0.66  | 0.59  | 0.58  | 0.54  | 0.62  | 0.50  | 0.48  | 0.75  |
| vacancy                        | 0.28    | 0.22  | 0.18  | 0.23  | 0.19  | 0.21  | 0.28  | 0.23  | 0.17  | 0.20  | 0.23  | 0.11  |

|                                |         |       |       |       |       |       |       |       |       |       |       |       |
|--------------------------------|---------|-------|-------|-------|-------|-------|-------|-------|-------|-------|-------|-------|
| O basis                        | 11      | 11    | 11    | 11    | 11    | 11    | 11    | 11    | 11    | 11    | 11    | 11    |
|                                | ULI9    |       |       |       | ULI19 |       |       |       | ULI22 |       |       |       |
|                                | Wm36    | Wm33  | Wm34  | Wm40  | Wm1   | Wm2   | Wm3   | Wm5   | Wm42  | Wm47  | Wm46  | Wn39  |
|                                | Wt%     |       |       |       |       |       |       |       |       |       |       |       |
| SiO <sub>2</sub>               | 50.24   | 48.91 | 52.12 | 49.85 | 47.78 | 48.91 | 50.24 | 49.85 | 47.61 | 45.24 | 46.77 | 48.82 |
| TiO <sub>2</sub>               | 0.67    | 0.14  | 0.52  | 0.13  | 1.29  | 0.14  | 0.67  | 0.13  | 0.40  | 0.67  | 0.67  | 1.62  |
| Al <sub>2</sub> O <sub>3</sub> | 31.15   | 31.54 | 30.73 | 31.43 | 30.46 | 31.54 | 31.15 | 31.43 | 30.03 | 32.74 | 31.48 | 33.32 |
| FeO                            | 1.96    | 2.30  | 2.53  | 3.47  | 2.59  | 2.30  | 1.96  | 3.47  | 3.21  | 4.35  | 6.99  | 3.97  |
| MnO                            | 0.00    | 0.00  | 0.00  | 0.00  | 0.02  | 0.00  | 0.00  | 0.00  | 0.00  | 0.00  | 0.00  | 0.02  |
| MgO                            | 1.75    | 1.90  | 1.81  | 2.64  | 1.91  | 1.90  | 1.75  | 2.64  | 4.54  | 1.51  | 1.01  | 1.27  |
| CaO                            | 0.09    | 0.05  | 0.07  | 0.07  | 0.08  | 0.05  | 0.09  | 0.07  | 0.26  | 0.62  | 0.31  | 0.33  |
| Na <sub>2</sub> O              | 0.38    | 0.40  | 1.04  | 0.28  | 0.35  | 0.40  | 0.38  | 0.28  | 0.87  | 0.44  | 0.00  | 0.87  |
| K <sub>2</sub> O               | 8.76    | 8.21  | 8.28  | 8.85  | 8.48  | 8.21  | 8.76  | 8.85  | 9.67  | 9.99  | 10.48 | 7.14  |
| Total                          | 95.00   | 93.45 | 97.10 | 96.72 | 92.96 | 93.45 | 95.00 | 96.72 | 96.59 | 95.56 | 97.71 | 97.36 |
|                                | Cations |       |       |       |       |       |       |       |       |       |       |       |
| Si                             | 3.31    | 3.28  | 3.36  | 3.26  | 3.24  | 3.28  | 3.31  | 3.26  | 3.16  | 3.06  | 3.13  | 3.16  |
| Fe <sub>TOT</sub>              | 0.11    | 0.13  | 0.14  | 0.19  | 0.15  | 0.13  | 0.11  | 0.19  | 0.18  | 0.25  | 0.39  | 0.21  |
| Al <sub>TOT</sub>              | 2.42    | 2.49  | 2.34  | 2.42  | 2.43  | 2.49  | 2.42  | 2.42  | 2.35  | 2.61  | 2.48  | 2.54  |
| Mg                             | 0.17    | 0.19  | 0.17  | 0.26  | 0.19  | 0.19  | 0.17  | 0.26  | 0.45  | 0.15  | 0.10  | 0.12  |
| Ca                             | 0.01    | 0.00  | 0.00  | 0.00  | 0.01  | 0.00  | 0.01  | 0.00  | 0.02  | 0.04  | 0.02  | 0.02  |
| Na                             | 0.05    | 0.05  | 0.13  | 0.04  | 0.05  | 0.05  | 0.05  | 0.04  | 0.11  | 0.06  | 0.00  | 0.11  |
| K                              | 0.74    | 0.70  | 0.68  | 0.74  | 0.73  | 0.70  | 0.74  | 0.74  | 0.82  | 0.86  | 0.89  | 0.59  |
| XMg                            | 0.61    | 0.60  | 0.56  | 0.58  | 0.57  | 0.60  | 0.61  | 0.58  | 0.72  | 0.38  | 0.20  | 0.36  |
| vacancy                        | 0.21    | 0.24  | 0.18  | 0.22  | 0.21  | 0.24  | 0.21  | 0.22  | 0.05  | 0.04  | 0.08  | 0.28  |
| O basis                        | 11      | 11    | 11    | 11    | 11    | 11    | 11    | 11    | 11    | 11    | 11    | 11    |

**Table S2.** Examples of mineral chemistry of chlorite selected along the S1 foliation of metapelites of IL units.

|                                |         |       |       |       |       |       |       |       |       |        |       |       |
|--------------------------------|---------|-------|-------|-------|-------|-------|-------|-------|-------|--------|-------|-------|
|                                | ULI3B   |       |       |       | ULI7  |       |       |       | ULI8  |        |       |       |
|                                | Chl32   | Chl3  | Chl31 | Chl29 | Chl27 | Chl1  | Chl9  | Chl6  | Chl29 | Chl297 | Chl3  | Chl29 |
|                                | Wt%     |       |       |       |       |       |       |       |       |        |       |       |
| SiO <sub>2</sub>               | 26.49   | 25.29 | 28.90 | 27.69 | 25.05 | 25.05 | 26.82 | 26.82 | 23.86 | 26.03  | 28.20 | 25.10 |
| TiO <sub>2</sub>               | 0.03    | 0.00  | 0.20  | 0.00  | 0.00  | 0.00  | 0.05  | 0.05  | 0.00  | 0.00   | 0.00  | 0.02  |
| Al <sub>2</sub> O <sub>3</sub> | 23.50   | 20.58 | 24.99 | 17.64 | 22.04 | 22.04 | 22.56 | 22.56 | 21.33 | 20.26  | 20.26 | 22.77 |
| FeO                            | 26.77   | 28.94 | 22.74 | 33.07 | 26.88 | 28.95 | 28.66 | 28.66 | 32.11 | 29.97  | 29.97 | 30.89 |
| MnO                            | 0.00    | 0.00  | 0.00  | 0.00  | 0.14  | 0.14  | 0.14  | 0.14  | 0.00  | 0.22   | 0.22  | 0.16  |
| MgO                            | 11.44   | 8.90  | 11.44 | 10.17 | 12.13 | 12.13 | 10.19 | 10.19 | 9.12  | 10.14  | 10.14 | 10.45 |
| CaO                            | 0.14    | 0.00  | 0.00  | 0.14  | 0.00  | 0.22  | 0.09  | 0.09  | 0.00  | 0.00   | 0.00  | 0.01  |
| Na <sub>2</sub> O              | 0.12    | 0.00  | 0.00  | 0.00  | 0.00  | 0.00  | 0.03  | 0.03  | 0.00  | 0.00   | 0.00  | 0.00  |
| K <sub>2</sub> O               | 0.71    | 0.84  | 0.17  | 0.17  | 0.42  | 0.00  | 0.09  | 0.09  | 0.00  | 0.19   | 0.19  | 0.03  |
| Total                          | 89.21   | 84.55 | 88.44 | 88.88 | 86.66 | 88.53 | 88.63 | 88.63 | 86.42 | 86.81  | 88.98 | 89.44 |
|                                | Cations |       |       |       |       |       |       |       |       |        |       |       |
| Si                             | 2.75    | 2.83  | 2.92  | 2.99  | 2.70  | 2.66  | 2.82  | 2.82  | 2.65  | 2.84   | 2.98  | 2.66  |
| Fe <sub>TOT</sub>              | 2.33    | 2.71  | 1.92  | 2.99  | 2.42  | 2.57  | 2.52  | 2.52  | 2.99  | 2.73   | 2.64  | 2.74  |
| Al <sub>TOT</sub>              | 2.88    | 2.72  | 2.98  | 2.25  | 2.80  | 2.76  | 2.80  | 2.80  | 2.80  | 2.60   | 2.52  | 2.84  |
| Mg                             | 1.77    | 1.49  | 1.72  | 1.64  | 1.95  | 1.92  | 1.60  | 1.60  | 1.51  | 1.65   | 1.59  | 1.65  |
| Ca                             | 0.02    | 0.00  | 0.00  | 0.02  | 0.00  | 0.03  | 0.01  | 0.01  | 0.00  | 0.00   | 0.00  | 0.00  |
| Na                             | 0.02    | 0.00  | 0.00  | 0.00  | 0.00  | 0.00  | 0.01  | 0.01  | 0.00  | 0.00   | 0.00  | 0.00  |

|           |       |       |       |       |       |       |       |       |       |        |        |        |
|-----------|-------|-------|-------|-------|-------|-------|-------|-------|-------|--------|--------|--------|
| K         | 0.09  | 0.12  | 0.02  | 0.02  | 0.06  | 0.00  | 0.01  | 0.01  | 0.00  | 0.03   | 0.03   | 0.00   |
| XMg       | 0.43  | 0.35  | 0.47  | 0.35  | 0.45  | 0.43  | 0.39  | 0.39  | 0.34  | 0.38   | 0.38   | 0.38   |
| vacancies | 0.19  | 0.19  | 0.41  | 0.11  | 0.10  | 0.04  | 0.22  | 0.22  | 0.05  | 0.14   | 0.23   | 0.08   |
| O basis   | 14    | 14    | 14    | 14    | 14    | 14    | 14    | 14    | 14    | 14     | 14     | 14     |
| ULI9      |       |       |       | ULI19 |       |       |       | ULI22 |       |        |        |        |
|           | Chl26 | Chl28 | Chl30 | Chl31 | Chl1  | Chl3  | Chl4  | Chl7  | Chl12 | Chl121 | Chl177 | Chl176 |
| Wt%       |       |       |       |       |       |       |       |       |       |        |        |        |
| SiO2      | 25.27 | 25.90 | 25.29 | 25.46 | 25.06 | 25.27 | 24.90 | 26.01 | 22.82 | 24.18  | 22.69  | 25.2   |
| TiO2      | 0.01  | 0.02  | 0.04  | 0.05  | 0.03  | 0.01  | 0.05  | 0.08  | 0.01  | 0.00   | 0.00   | 0.00   |
| Al2O3     | 22.20 | 22.81 | 22.42 | 22.50 | 23.59 | 22.20 | 21.40 | 22.42 | 19.96 | 21.40  | 20.65  | 20.65  |
| FeO       | 29.27 | 29.98 | 27.79 | 26.92 | 33.05 | 29.27 | 28.69 | 27.57 | 32.21 | 28.44  | 29.42  | 29.98  |
| MnO       | 0.08  | 0.10  | 0.12  | 0.13  | 0.01  | 0.08  | 0.13  | 0.14  | 0.00  | 0.00   | 0.00   | 0.00   |
| MgO       | 9.74  | 9.85  | 12.06 | 12.61 | 6.60  | 9.74  | 11.80 | 10.95 | 9.34  | 8.86   | 9.65   | 12.34  |
| CaO       | 0.04  | 0.03  | 0.02  | 0.04  | 0.05  | 0.04  | 0.05  | 0.03  | 0.23  | 0.40   | 0.58   | 0.17   |
| Na2O      | 0.03  | 0.00  | 0.03  | 0.05  | 0.00  | 0.03  | 0.09  | 0.02  | 0.00  | 0.61   | 0.61   | 0.00   |
| K2O       | 0.45  | 0.15  | 0.12  | 0.13  | 0.17  | 0.45  | 0.20  | 0.25  | 0.48  | 0.53   | 0.39   | 0.32   |
| Total     | 89.21 | 88.84 | 87.89 | 87.89 | 88.56 | 87.08 | 87.31 | 87.46 | 85.05 | 84.42  | 83.99  | 88.66  |
| Cations   |       |       |       |       |       |       |       |       |       |        |        |        |
| Si        | 2.74  | 2.74  | 2.69  | 2.69  | 2.71  | 2.74  | 2.69  | 2.77  | 2.61  | 2.72   | 2.60   | 2.70   |
| FeTOT     | 2.65  | 2.66  | 2.47  | 2.38  | 2.99  | 2.65  | 2.59  | 2.46  | 3.08  | 2.67   | 2.82   | 2.68   |
| AlTOT     | 2.83  | 2.85  | 2.81  | 2.80  | 3.01  | 2.83  | 2.72  | 2.81  | 2.69  | 2.84   | 2.79   | 2.61   |
| Mg        | 1.57  | 1.56  | 1.91  | 1.99  | 1.06  | 1.57  | 1.90  | 1.74  | 1.59  | 1.48   | 1.65   | 1.97   |
| Ca        | 0.00  | 0.00  | 0.00  | 0.00  | 0.01  | 0.00  | 0.01  | 0.00  | 0.03  | 0.05   | 0.07   | 0.02   |
| Na        | 0.01  | 0.00  | 0.01  | 0.01  | 0.00  | 0.01  | 0.02  | 0.00  | 0.00  | 0.13   | 0.14   | 0.00   |
| K         | 0.06  | 0.02  | 0.02  | 0.02  | 0.02  | 0.06  | 0.03  | 0.03  | 0.07  | 0.08   | 0.06   | 0.04   |
| XMg       | 0.37  | 0.37  | 0.44  | 0.46  | 0.26  | 0.37  | 0.42  | 0.41  | 0.34  | 0.36   | 0.37   | 0.42   |
| vacancies | 0.15  | 0.17  | 0.09  | 0.10  | 0.21  | 0.16  | 0.05  | 0.18  | 0.00  | 0.14   | 0.01   | 0.00   |
| O basis   | 14    | 14    | 14    | 14    | 14    | 14    | 14    | 14    | 14    | 14     | 14     | 14     |

### Chlorite-quartz-water method

**Table S3.** Starting pressure values adopted for Chlorite-quartz-water method. In bold is reported the P value chosen and the related Fe<sup>3+</sup> percentage.

| Value (GPa) | ULI3b                                 | ULI7                                  | ULI8                                  | ULI9                                  | ULI19                                 | ULI22                                 |
|-------------|---------------------------------------|---------------------------------------|---------------------------------------|---------------------------------------|---------------------------------------|---------------------------------------|
| 0.1         |                                       |                                       |                                       |                                       |                                       | X                                     |
| 0.2         |                                       |                                       |                                       |                                       |                                       | X                                     |
| 0.3         |                                       |                                       |                                       |                                       |                                       | <b>X (Fe<sup>3+</sup> in FeO=30%)</b> |
| 0.4         | X                                     | X                                     |                                       |                                       | X                                     | X                                     |
| 0.5         | X                                     | X                                     | X                                     | X                                     | <b>X (Fe<sup>3+</sup> in FeO=30%)</b> | X                                     |
| 0.6         | X                                     | X                                     |                                       |                                       | X                                     | X                                     |
| 0.7         | X                                     | X                                     | X                                     | X                                     | X                                     | X                                     |
| 0.8         | X                                     | X                                     | <b>X (Fe<sup>3+</sup> in FeO=20%)</b> | <b>X (Fe<sup>3+</sup> in FeO=30%)</b> | X                                     |                                       |
| 0.9         | <b>X (Fe<sup>3+</sup> in FeO=30%)</b> | <b>X (Fe<sup>3+</sup> in FeO=30%)</b> | X                                     | X                                     | X                                     |                                       |
| 1.0         | X                                     | X                                     | X                                     | X                                     | X                                     |                                       |



*Phengite-quartz-water method*

ULI3B (XH<sub>2</sub>O= 97%)

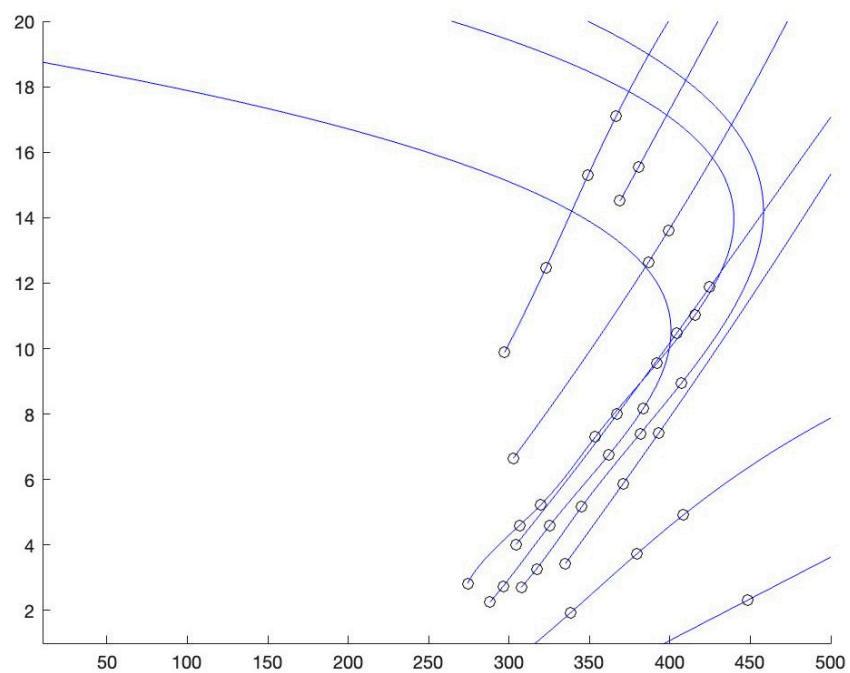

ULI7 (XH<sub>2</sub>O= 97%)

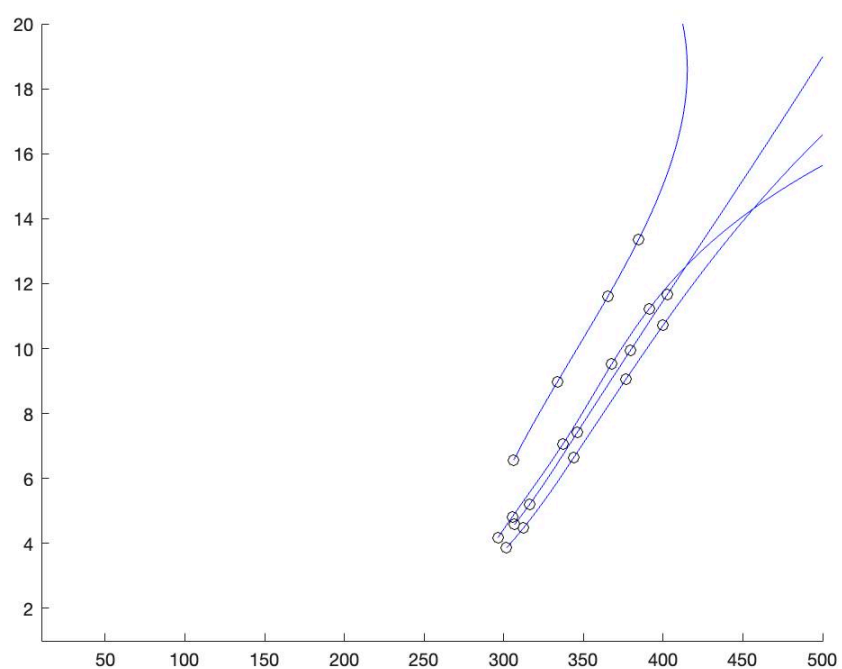

ULI8 (XH<sub>2</sub>O= 94%)

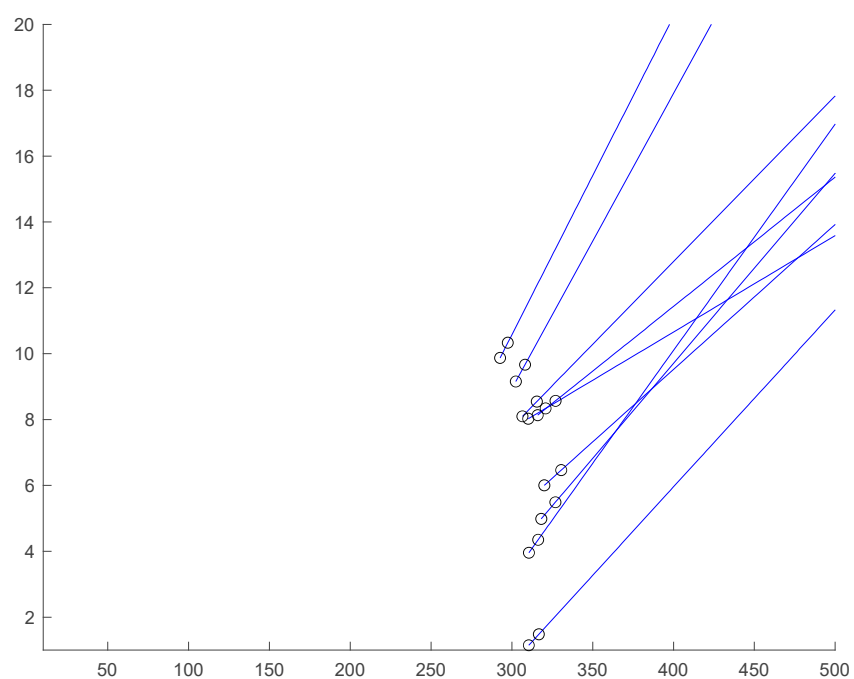

ULI9 (XH<sub>2</sub>O= 95%)

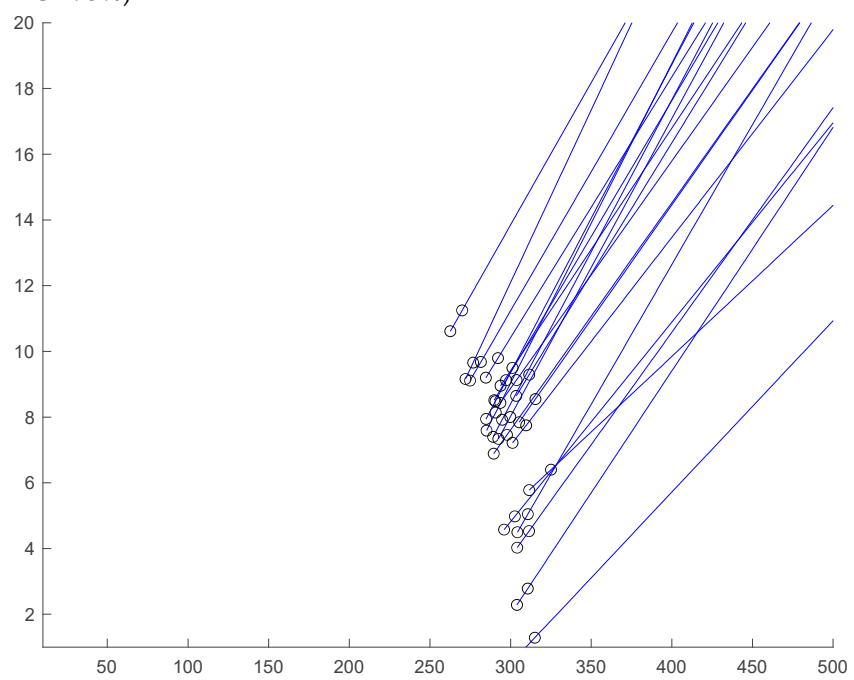

ULI19 (XH<sub>2</sub>O= 96%)

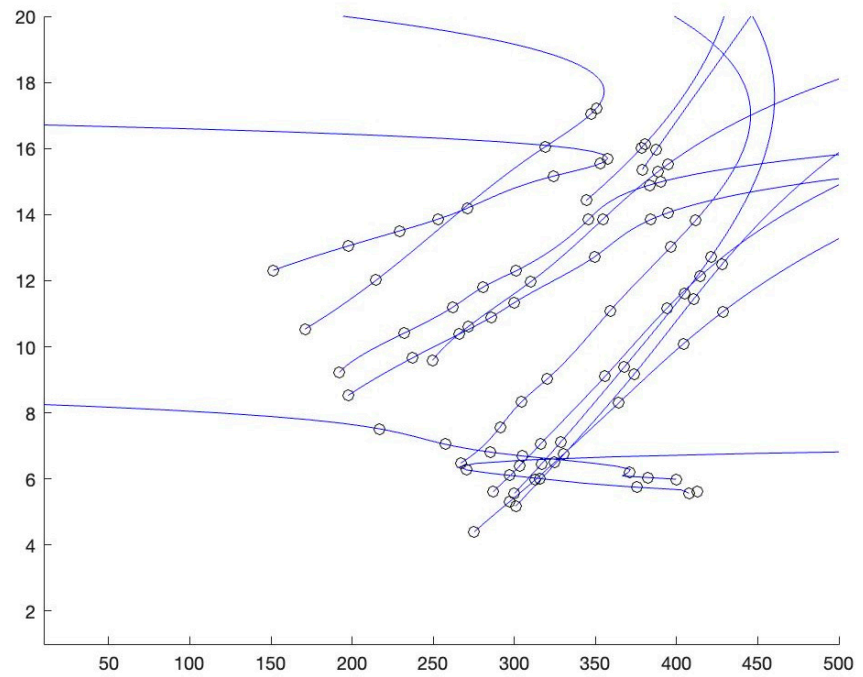

ULI22 (XH<sub>2</sub>O= 96%)

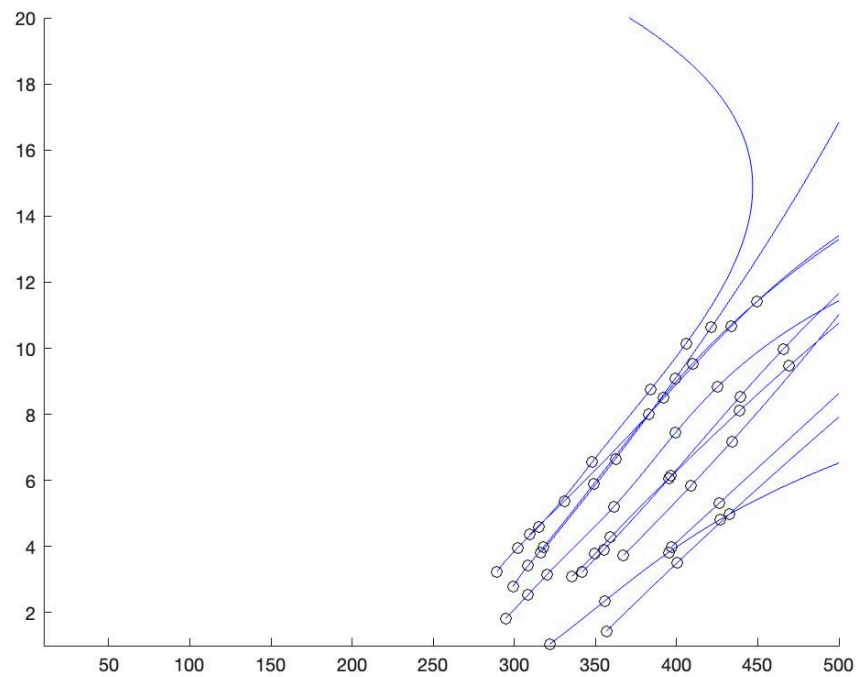

**Figure S1.** P/T diagrams showing for each sample, the results of the Phengite-quartz-water method of Dubacq et al. (2010). Blue lines represent analyzed phengite. Black circles along these lines indicate the structural water (XH<sub>2</sub>O) needed to achieved such P-T conditions. XH<sub>2</sub>O chosen for modeling (reported in Fig. 6) is also given.

*Chlorite-phengite-quartz-water method*

ULI3b

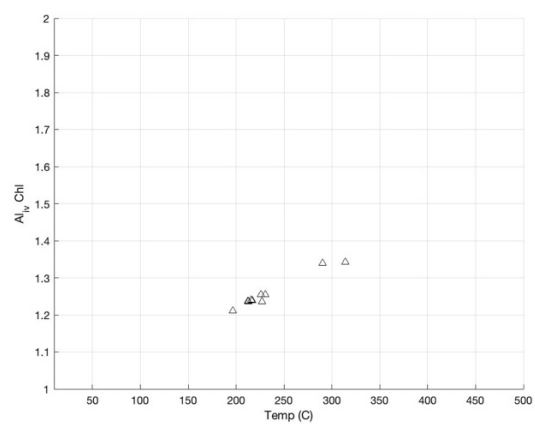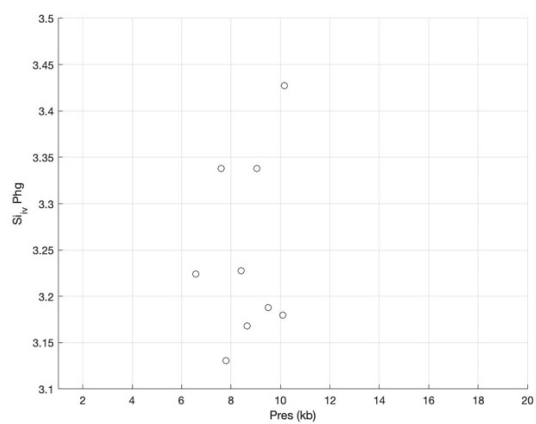

ULI7

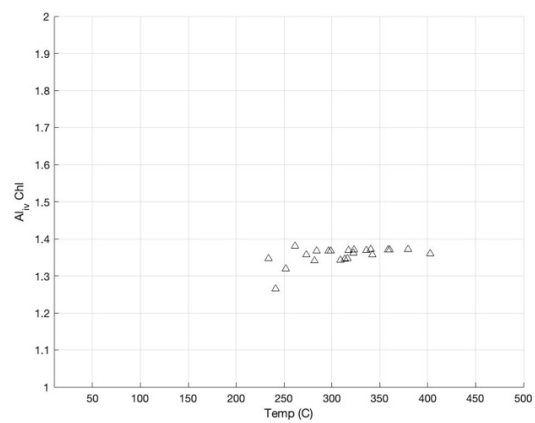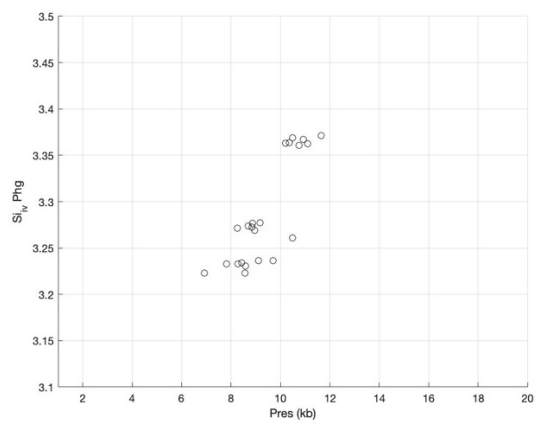

ULI8

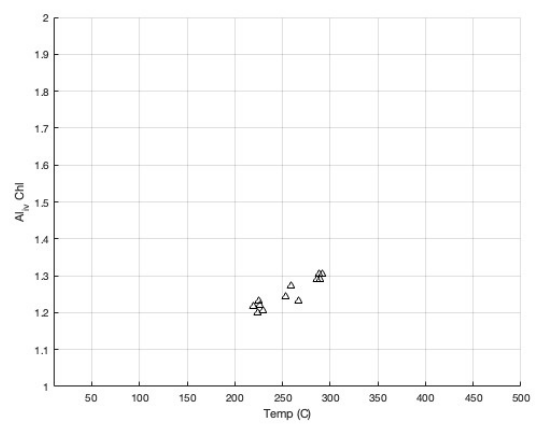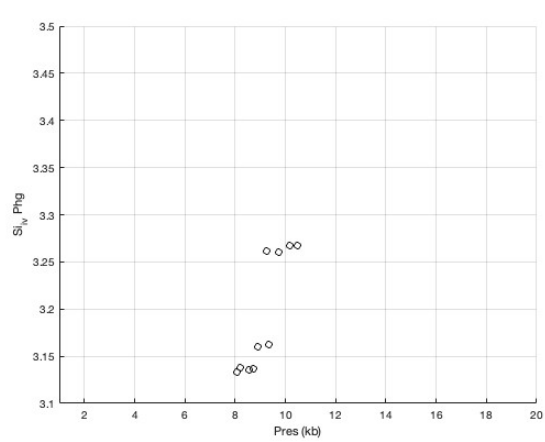



ULI9

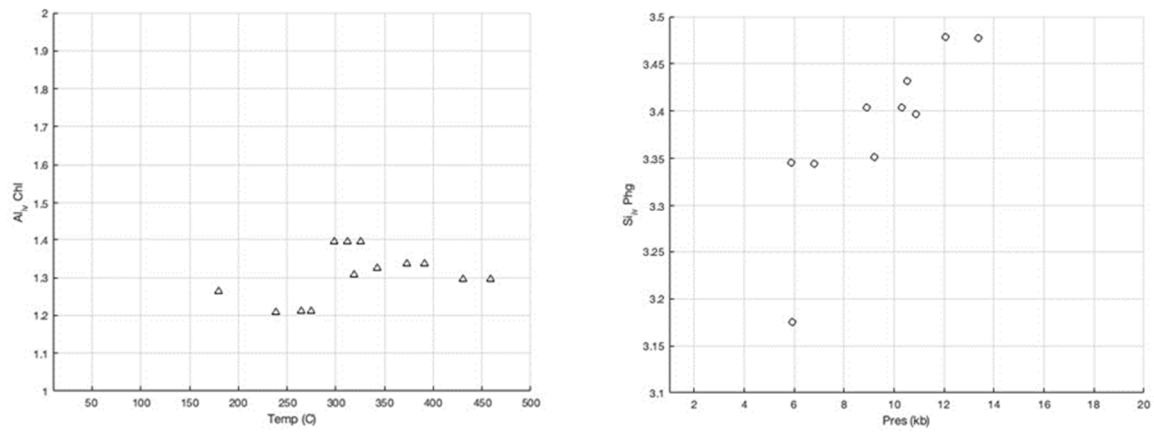

ULI19

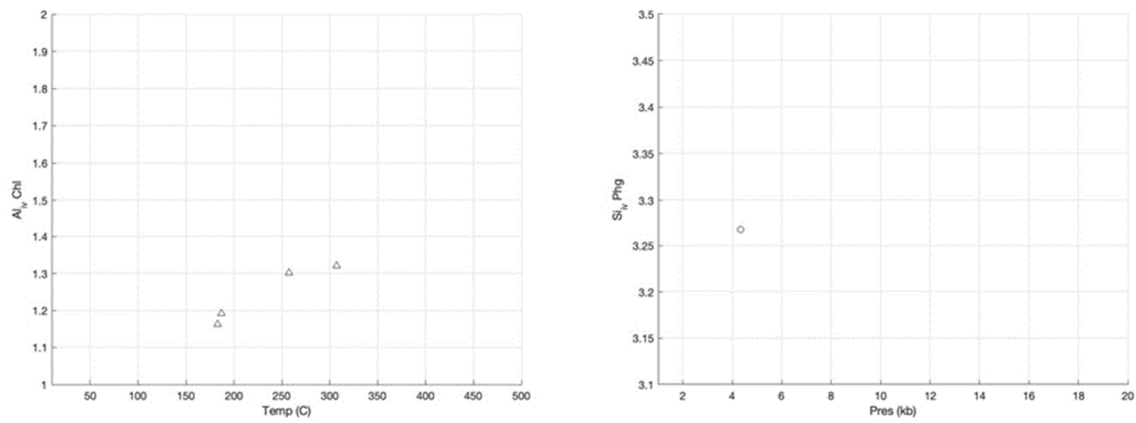

ULI22

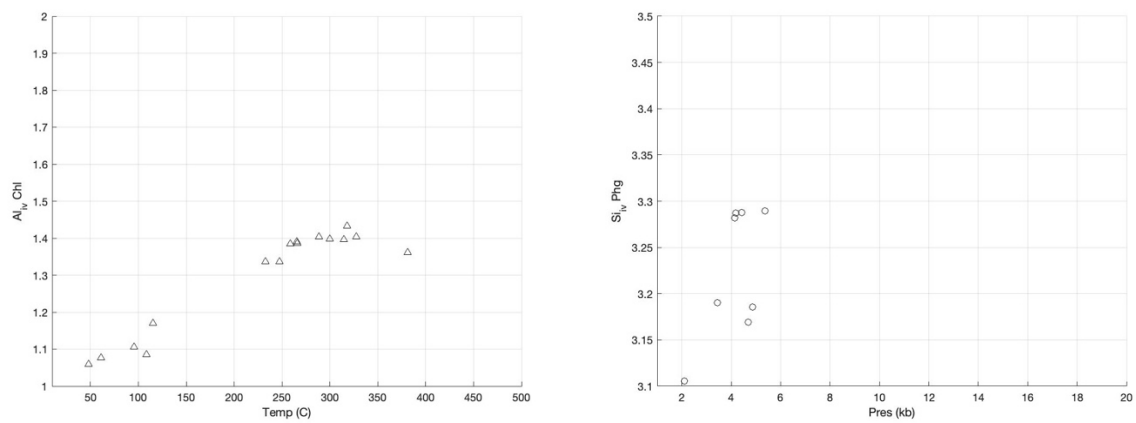

**Figure S2.** Diagrams showing T (°C) vs Al<sup>IV</sup> in chlorite and P (kbar) vs. Si<sup>IV</sup> in phengite.

## Reference list

Dubacq, B., Vidal, O., & De Andrade, V. 2010. Dehydration of dioctahedral aluminous phyllosilicates: thermodynamic modelling and implications for thermobarometric estimates. *Contributions to mineralogy and petrology*, 159, 159-174.

Lanari, P. 2012. Micro-cartographie P-T-t' dans les roches métamorphiques. Applications aux Alpes et à l'Himalaya (Ph.D. thesis), Grenoble. Université de Grenoble.

Lanari, P., Vidal, O., De Andrade, V., Dubacq, B., Lewin, E., Grosch, E. G. & Schwartz, S. 2014. XMapTools: A MATLAB©-based program for electron microprobe X-ray image processing and geothermobarometry. *Computers & Geosciences*, 62, 227-240.
